# Supplementary material for: RAINBOW: Haplotype-based genome-wide association study using a novel SNP-set method
Source: PubMed Central journal article supplement (PMC7046296; doi:10.1371/journal.pcbi.1007663), 2020-02-14

# Iteration 40

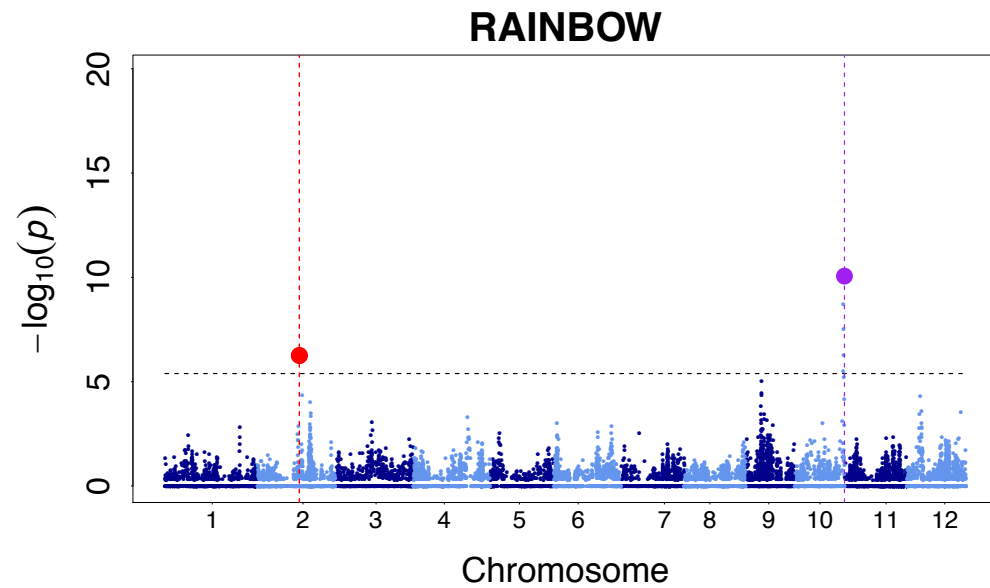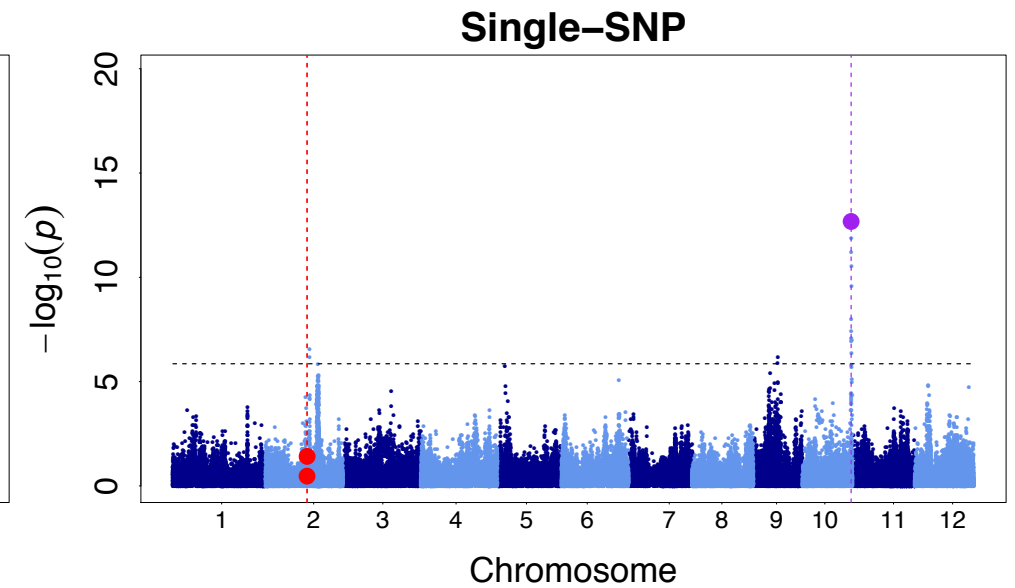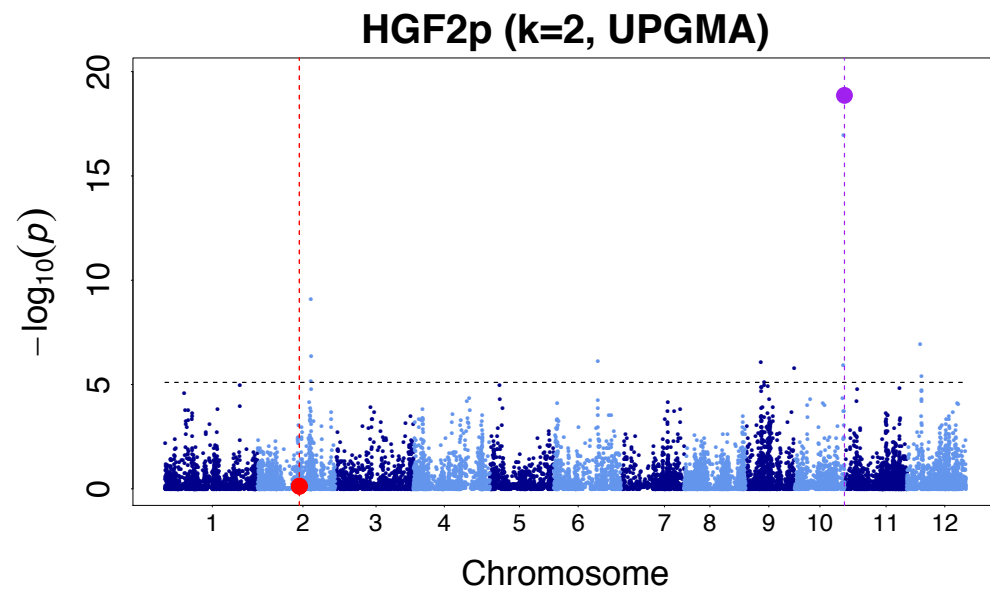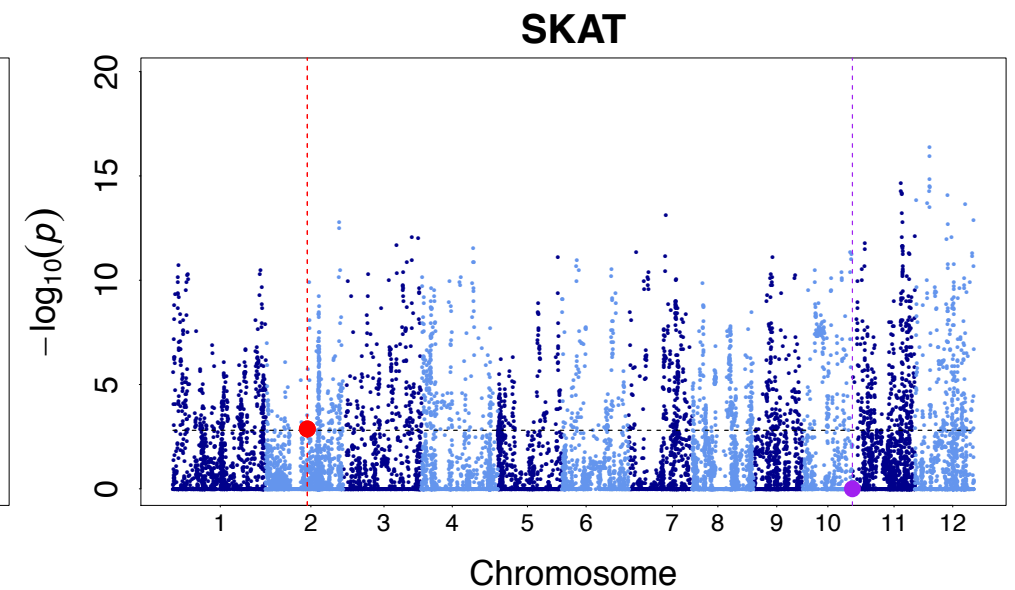

# Iteration 43

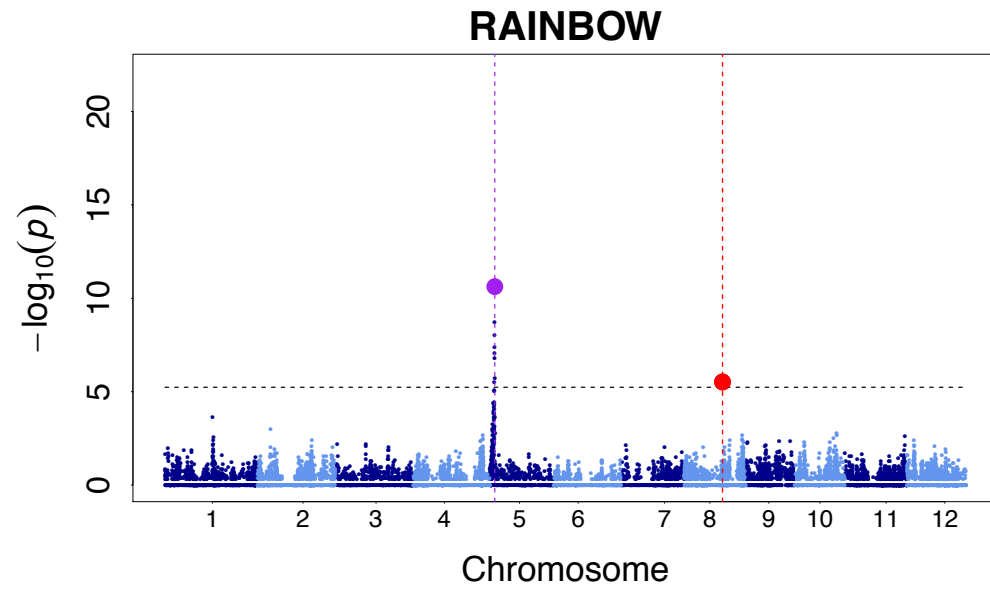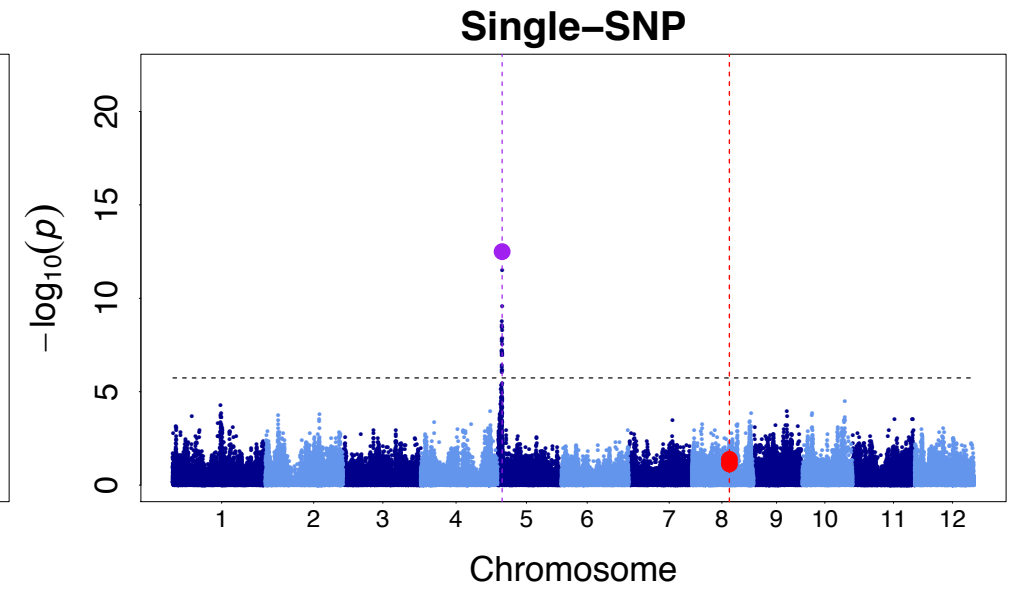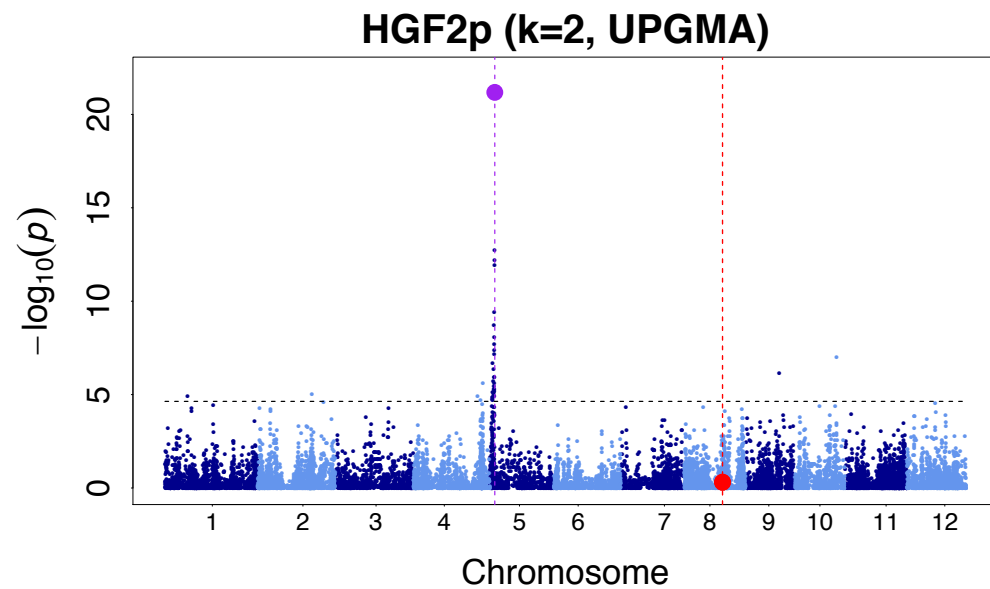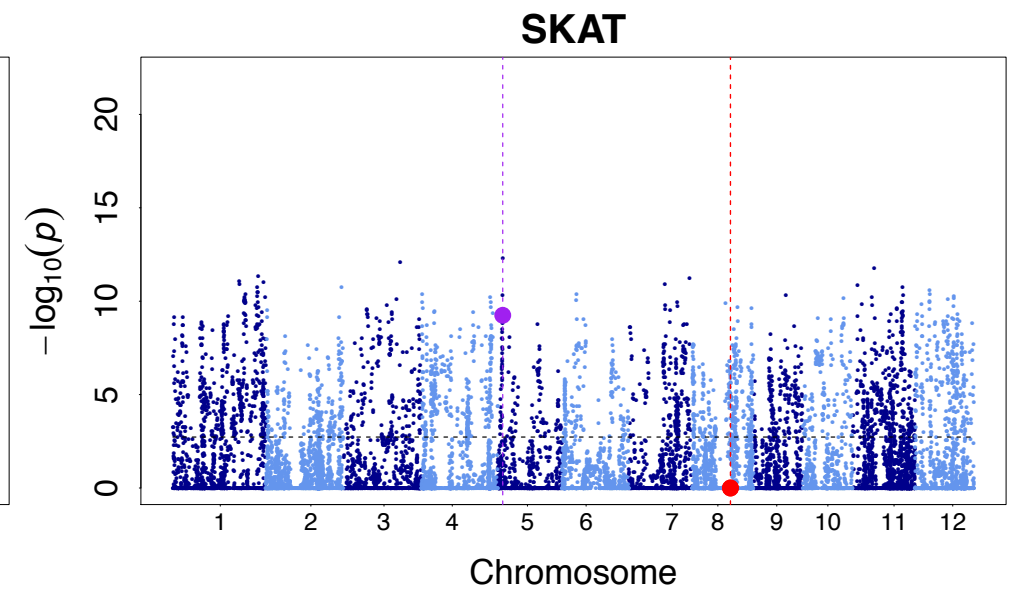

# Iteration 64

**RAINBOW**

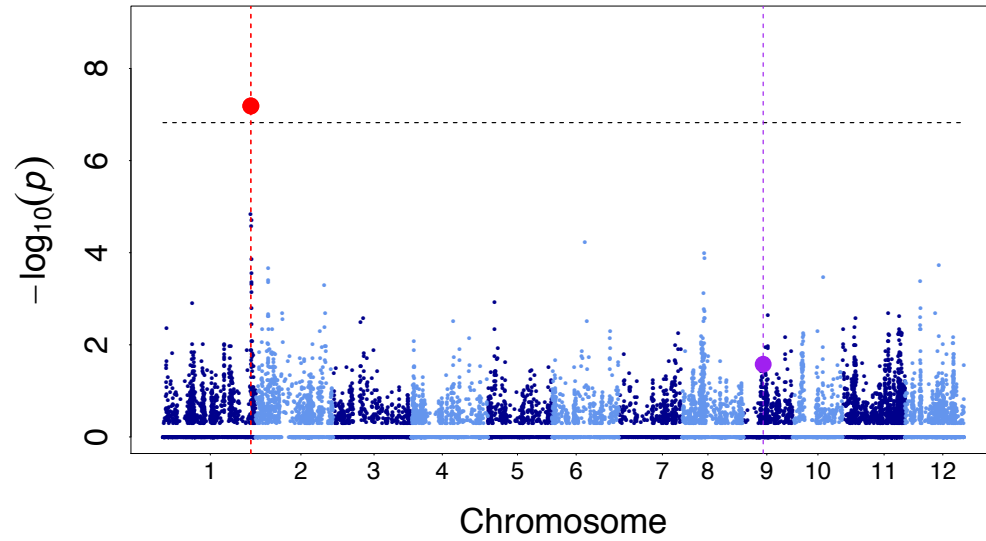

**Single-SNP**

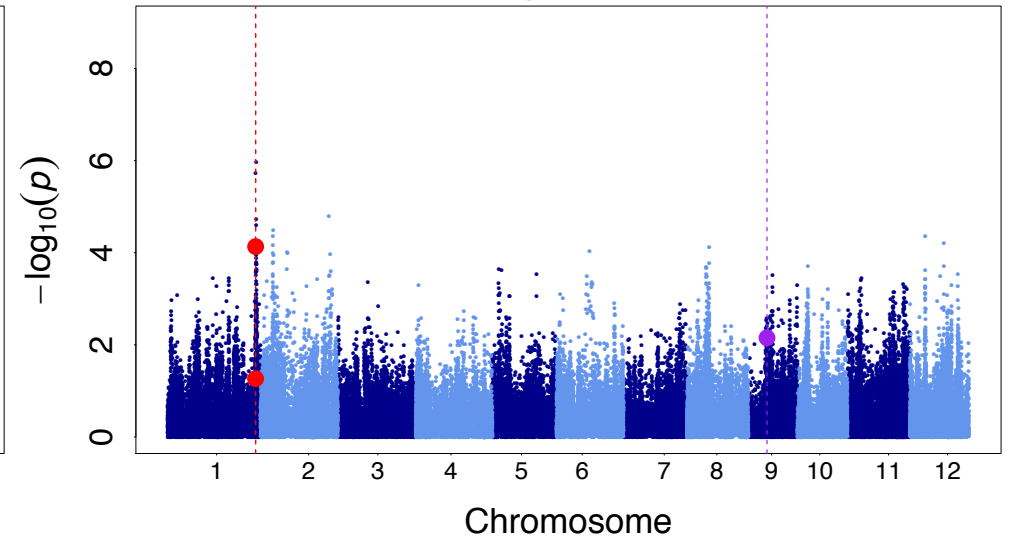

**HGF2p (k=2, UPGMA)**

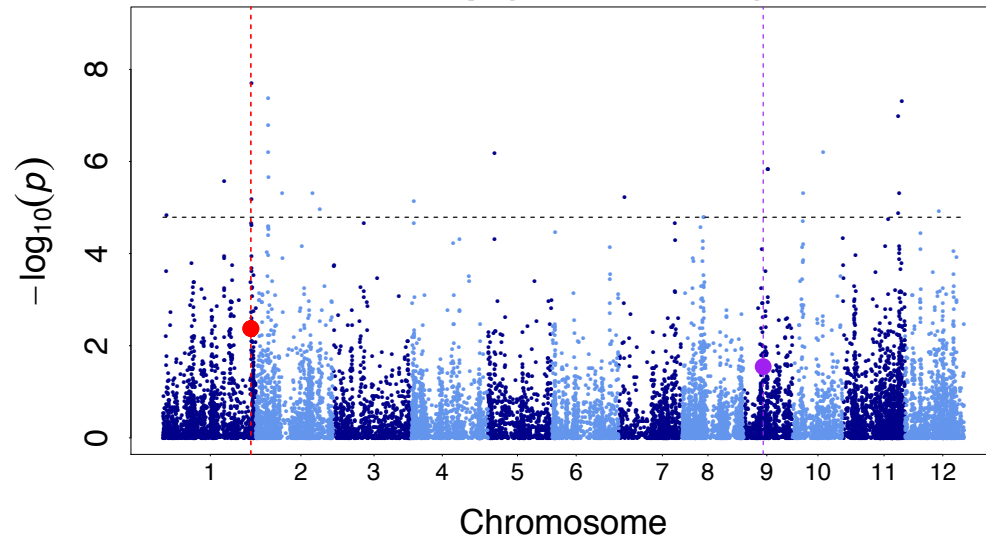

**SKAT**

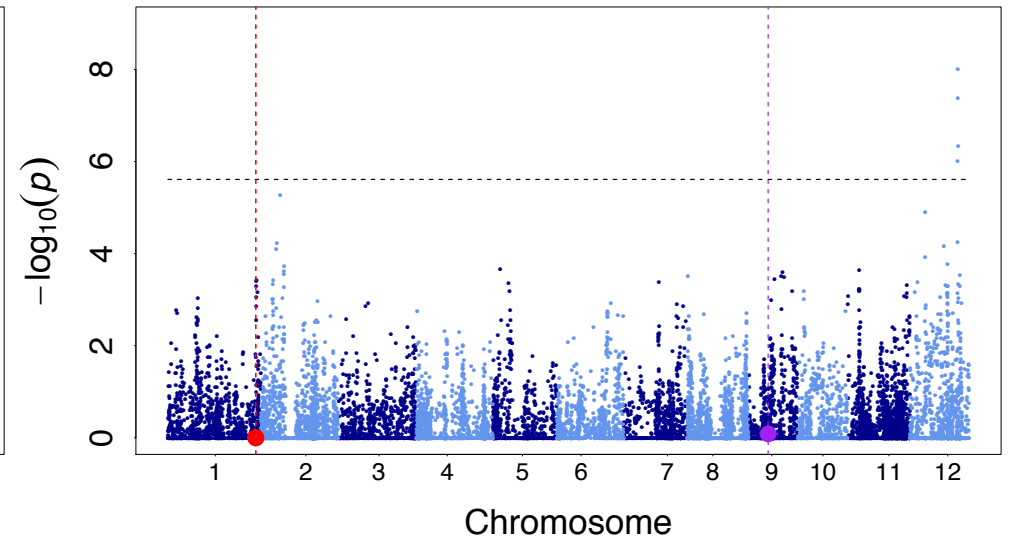

# Iteration 69

**RAINBOW**

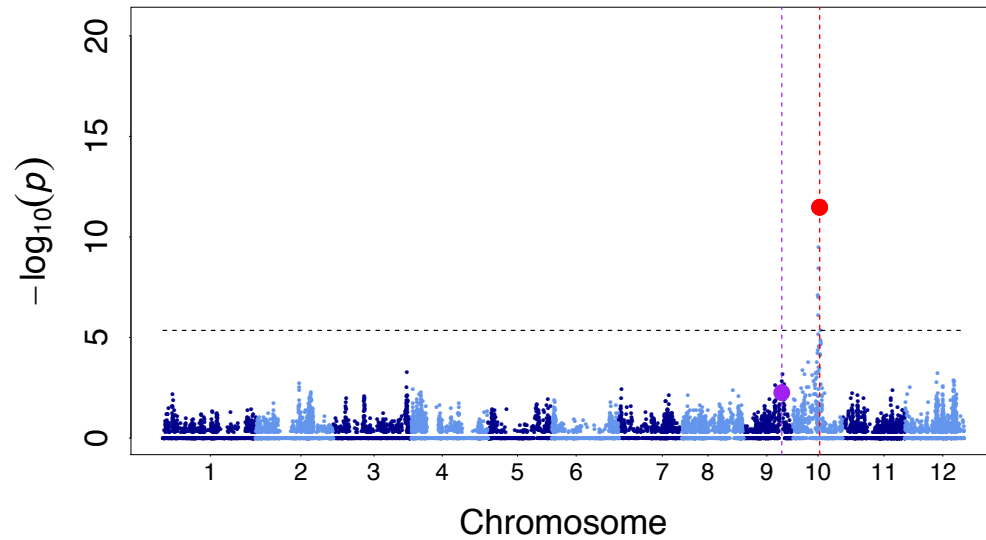

**Single-SNP**

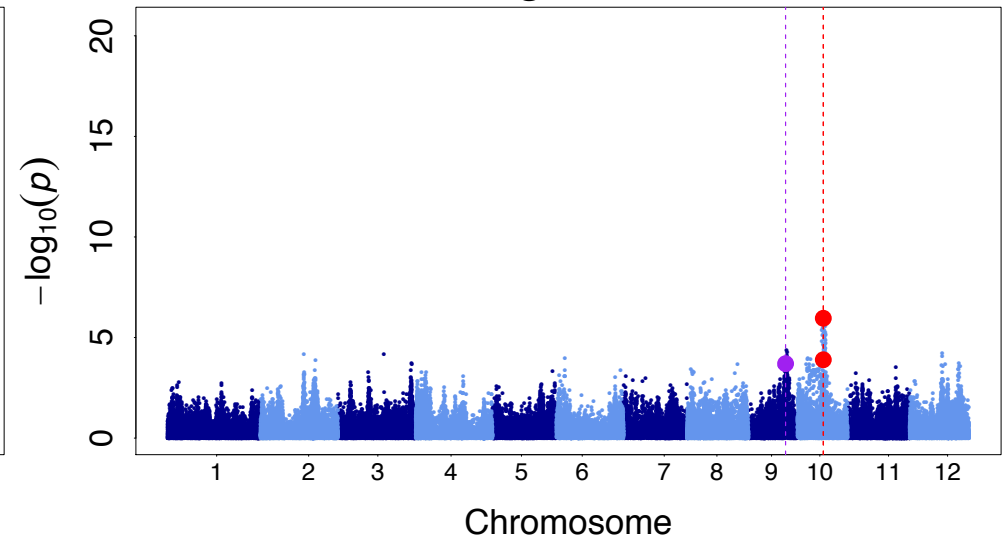

**HGF2p (k=2, UPGMA)**

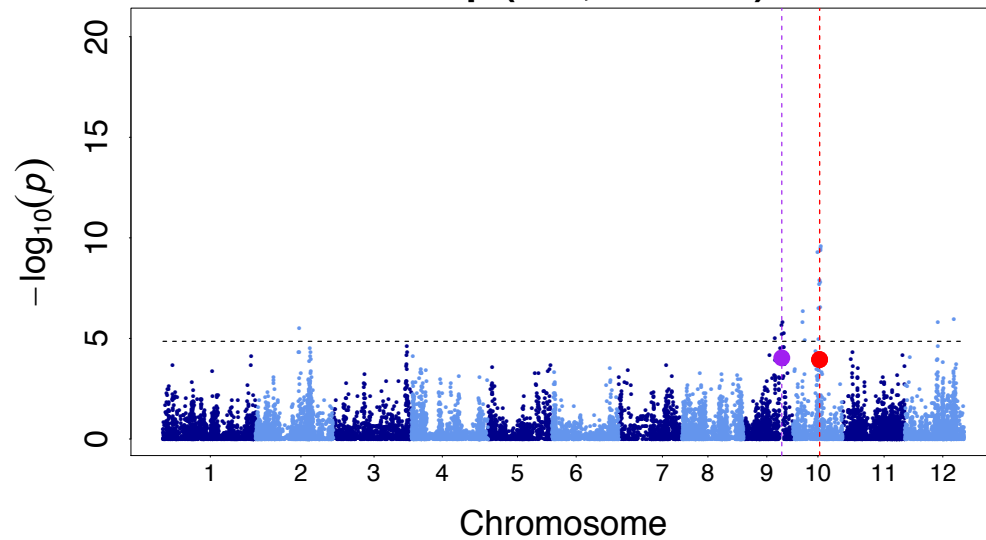

**SKAT**

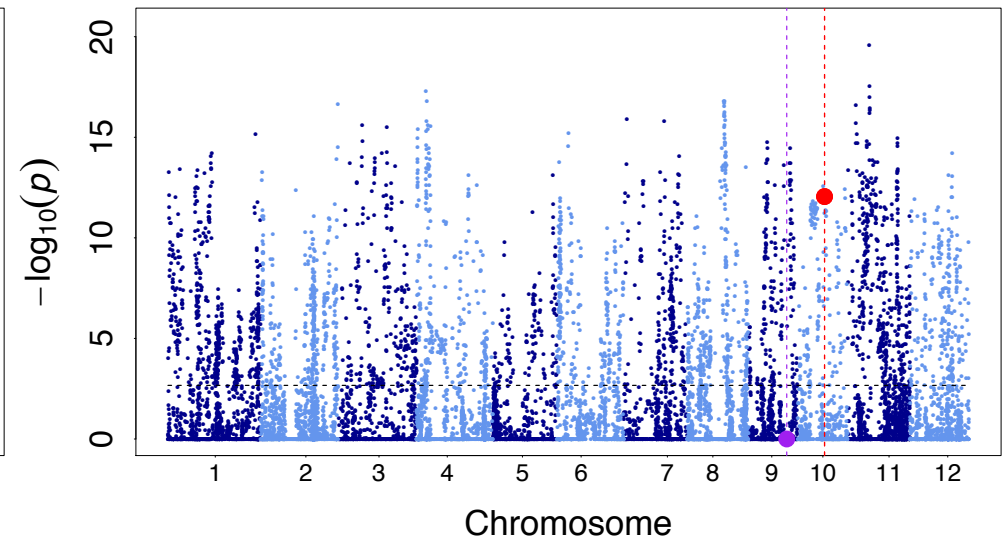

# Iteration 81

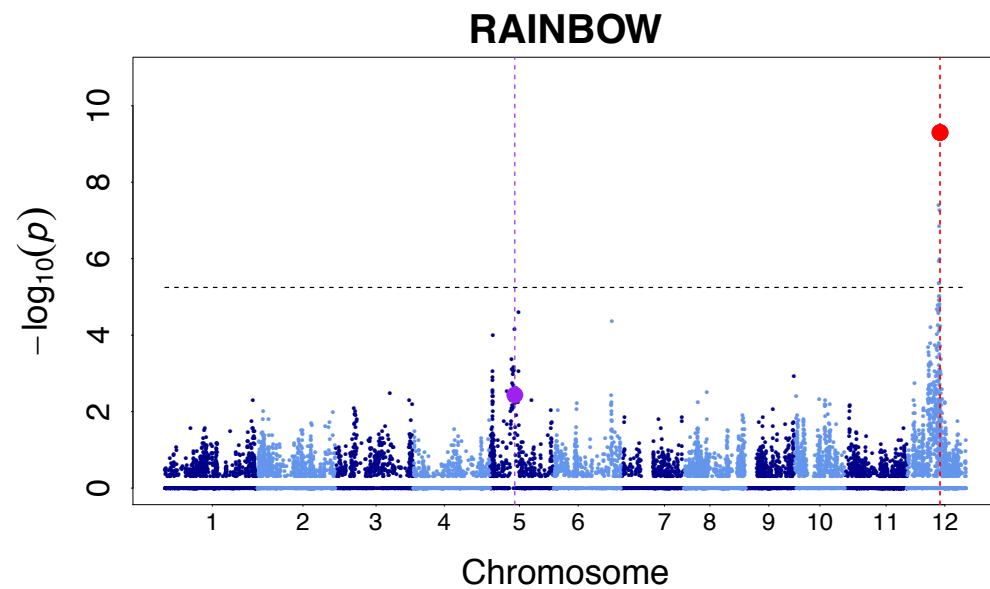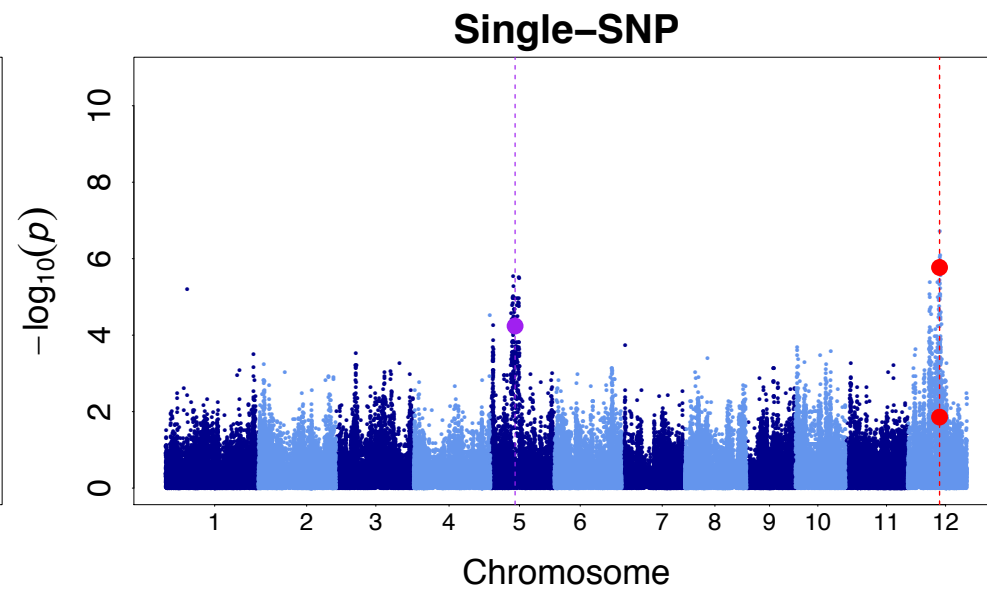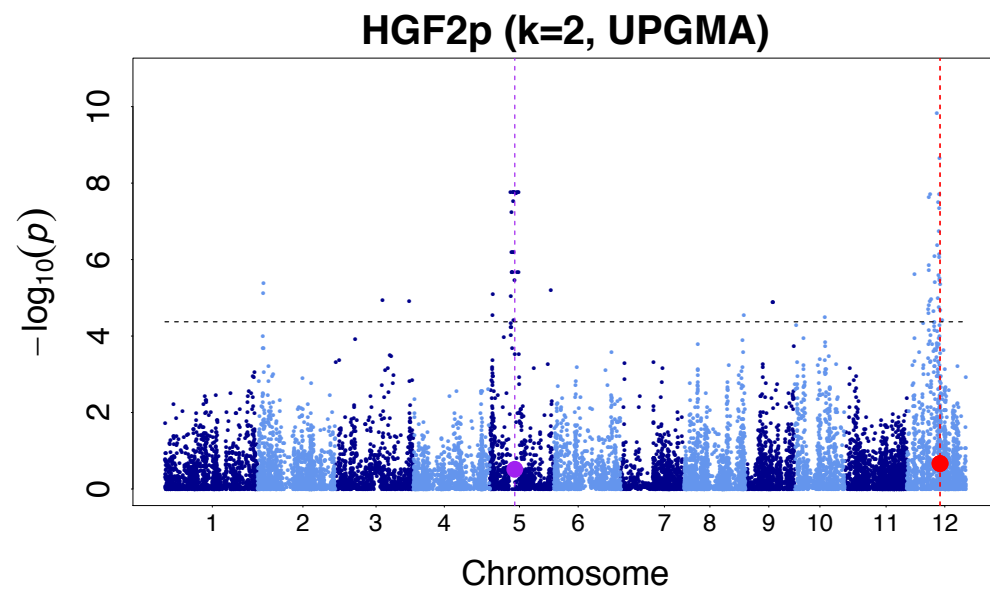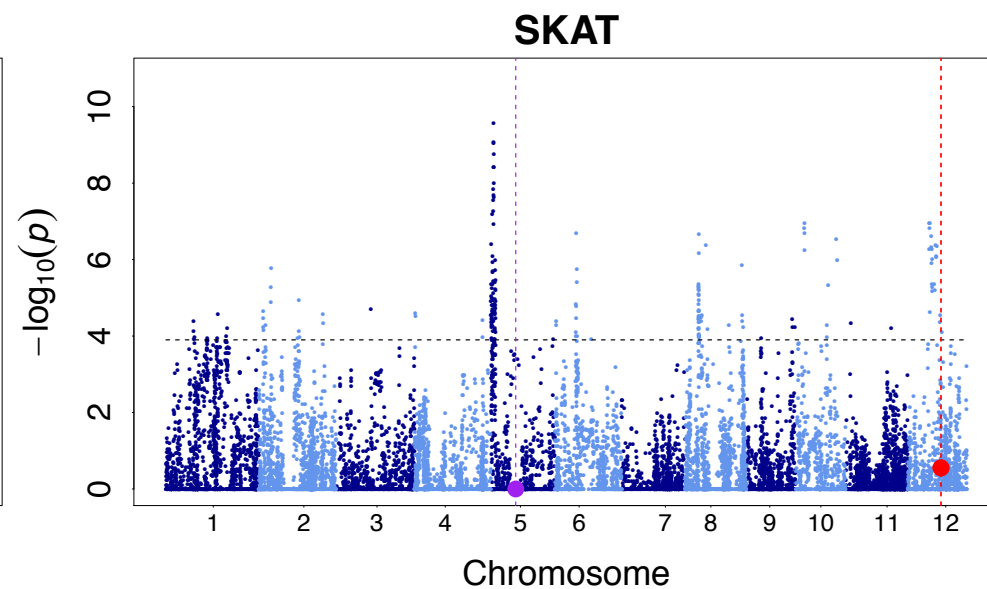

# Iteration 85

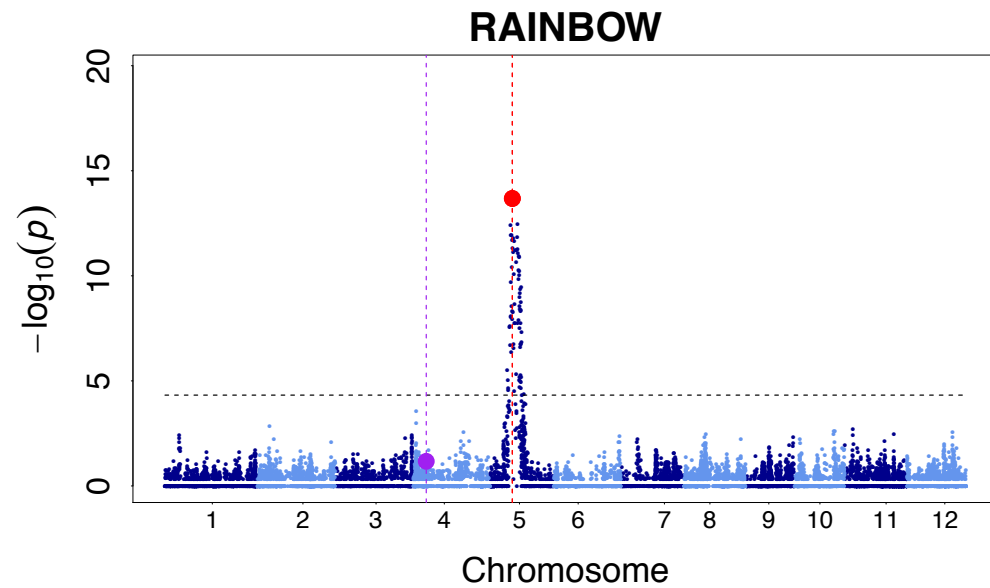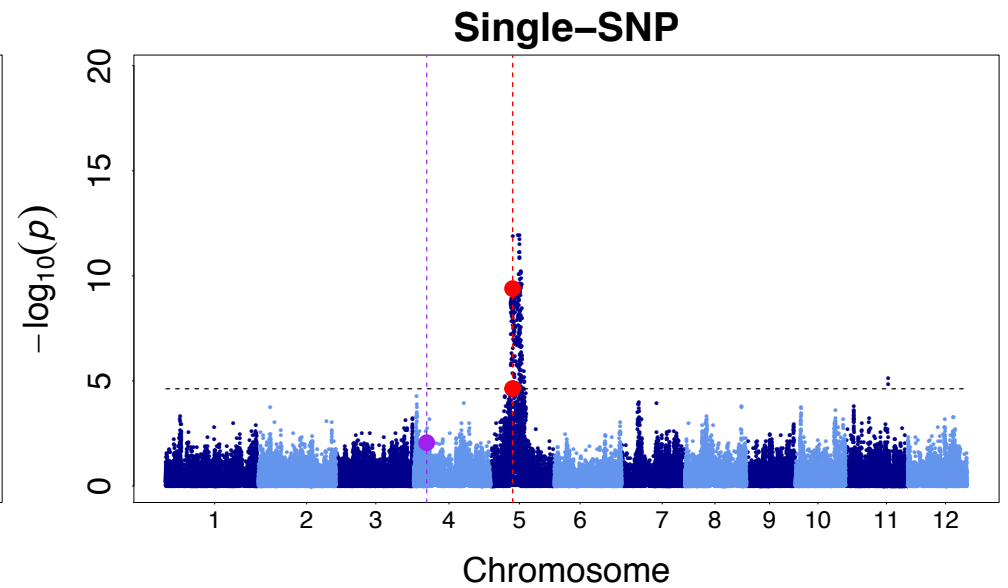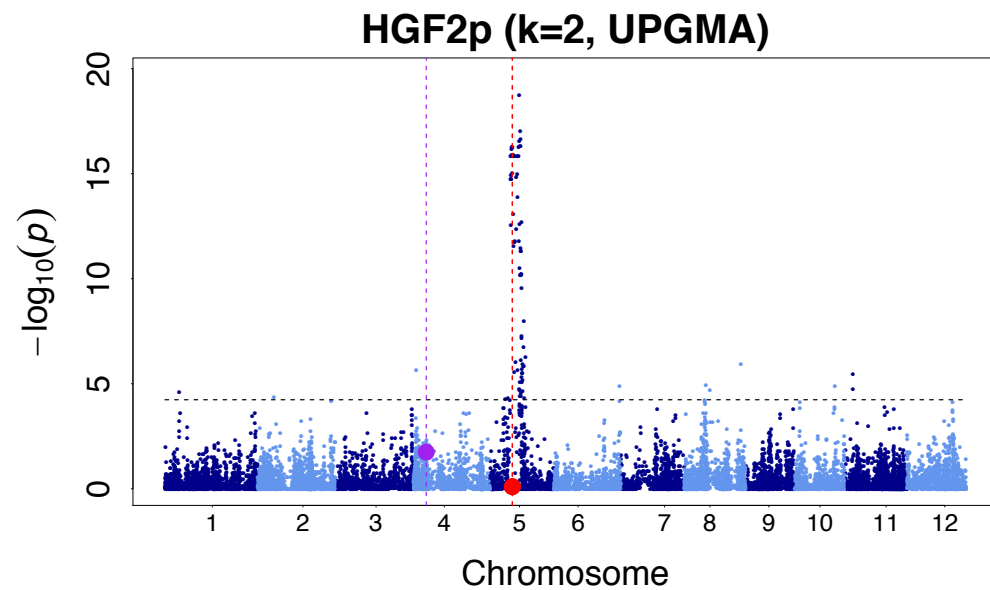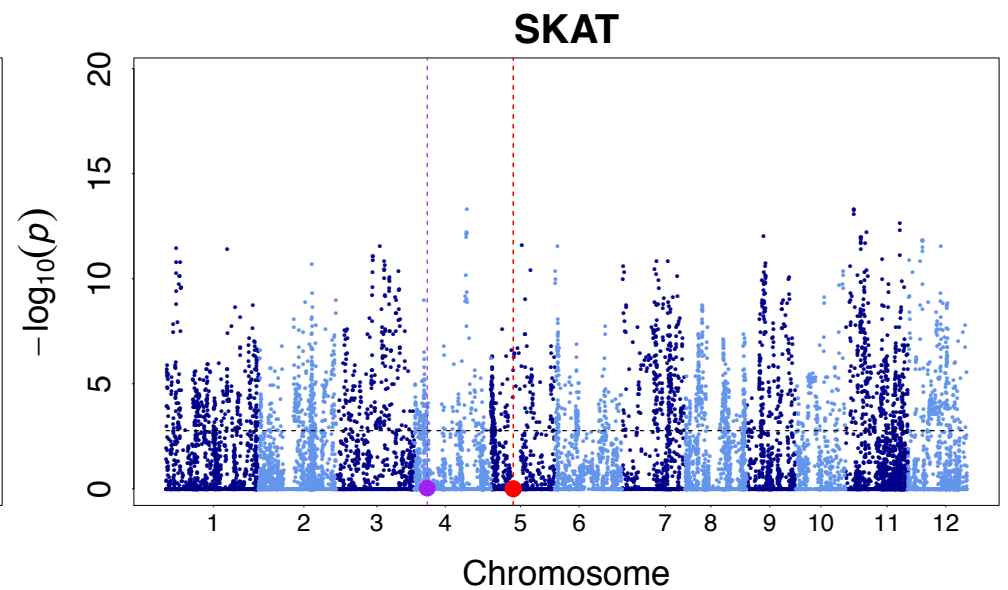

Supplement: pcbi.1007663.s009.pdf [file pcbi.1007663.s009.pdf]
