# Supplementary material for: RAINBOW: Haplotype-based genome-wide association study using a novel SNP-set method
Source: PubMed Central journal article supplement (PMC7046296; doi:10.1371/journal.pcbi.1007663), 2020-02-14
Supplement: pcbi.1007663.s004.pdf [file pcbi.1007663.s004.pdf]

❖ Simulation of phenotypic values (**100** iterations)

$$\mathbf{y} = \mathbf{X}_1\beta_1 + \mathbf{X}_2\beta_2 + \mathbf{X}_3\beta_3 + \mathbf{Z}\mathbf{u} + \mathbf{e}, (\text{Eq. 1})$$

$\mathbf{y}$ : phenotypic values       $\mathbf{X}_1\beta_1, \mathbf{X}_2\beta_2, \mathbf{X}_3\beta_3$ : fixed effects (marker effects)  
 $\mathbf{Z}\mathbf{u}$ : random effects (polygene effects)       $\mathbf{e}$ : residuals

•  $\mathbf{X}_1$  and  $\mathbf{X}_2$  belong to the same haplotype block.

one haplotype block

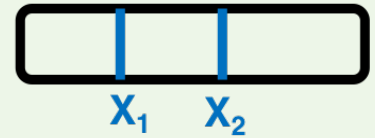

❖ We assumed 2 scenarios.

① **Coupling** :  $\text{cor}(\mathbf{X}_1, \mathbf{X}_2) > 0 \rightarrow \beta_1 = \beta_2$ ,  $\text{cor}(\mathbf{X}_1, \mathbf{X}_2) < 0 \rightarrow \beta_1 = -\beta_2$

② **Repulsion** :  $\text{cor}(\mathbf{X}_1, \mathbf{X}_2) > 0 \rightarrow \beta_1 = -\beta_2$ ,  $\text{cor}(\mathbf{X}_1, \mathbf{X}_2) < 0 \rightarrow \beta_1 = \beta_2$

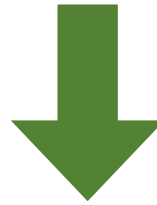

❖ Perform GWAS with 4 methods.

① Our proposed method, **RAINBOW** (R package RAINBOWR)

② The **single-SNP** method (R package rrBLUP)

③ **Haplotype-based** method introduced by Yano *et al.*, 2016

④ **SNP-set** method, SKAT (R package SKAT)

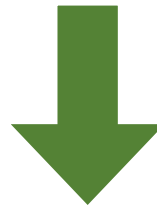

❖ Evaluate the results with the following summary statistics

①  $-\log_{10}(p)$  and  $-\log_{10}(p_\alpha)$ , correspond to the **detection power**

② **Recall, Precision, and F-measure**

③ **AUC** (area under the curve) for **regions around causals**
