# Supplementary material for: RAINBOW: Haplotype-based genome-wide association study using a novel SNP-set method
Source: PubMed Central journal article supplement (PMC7046296; doi:10.1371/journal.pcbi.1007663), 2020-02-14

# ( i ) Coupling

## Haplotype-based results

## LD-based results

# ( ii ) Repulsion

## Haplotype-based results

## LD-based results

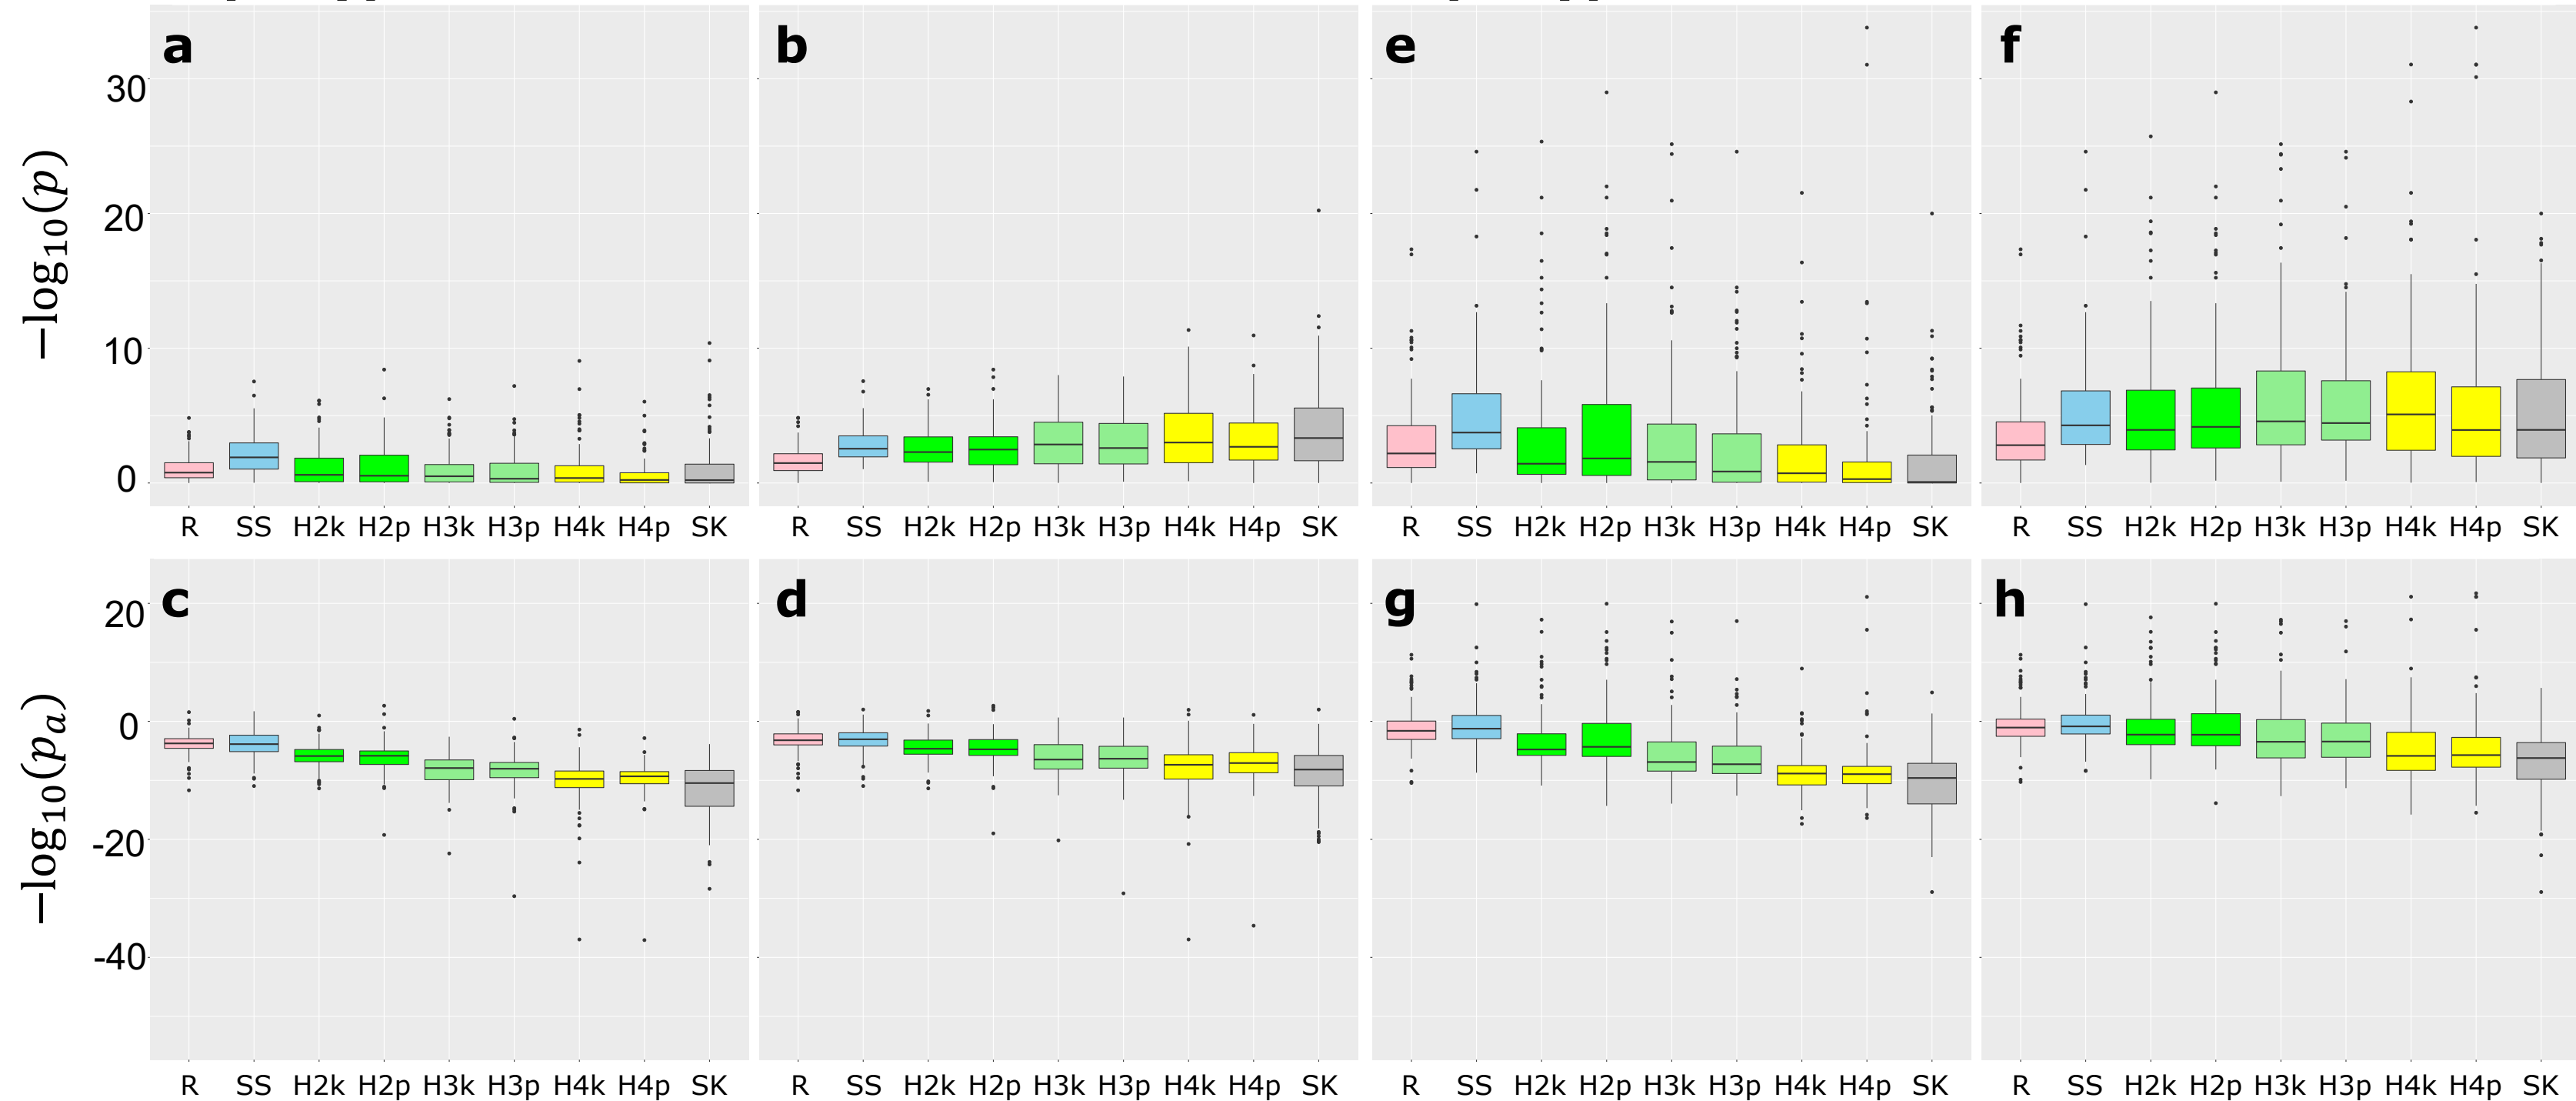

Supplement: pcbi.1007663.s005.pdf [file pcbi.1007663.s005.pdf]
