# Supplementary material for: RAINBOW: Haplotype-based genome-wide association study using a novel SNP-set method
Source: PubMed Central journal article supplement (PMC7046296; doi:10.1371/journal.pcbi.1007663), 2020-02-14

**( i ) Coupling**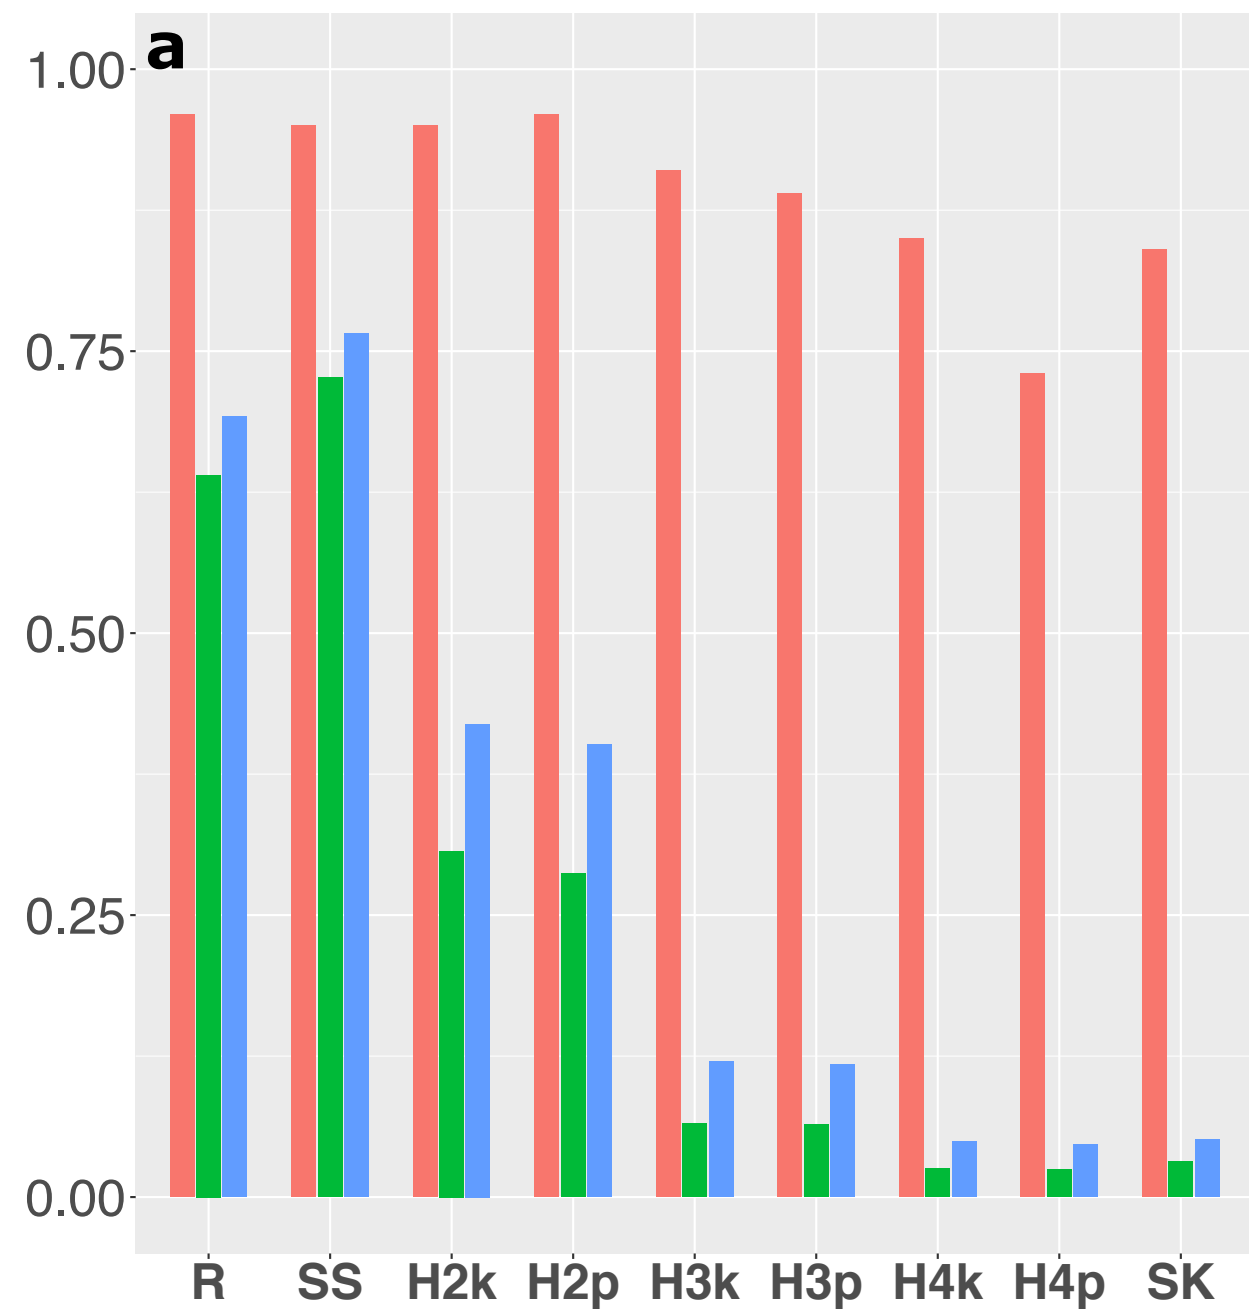**( ii ) Repulsion**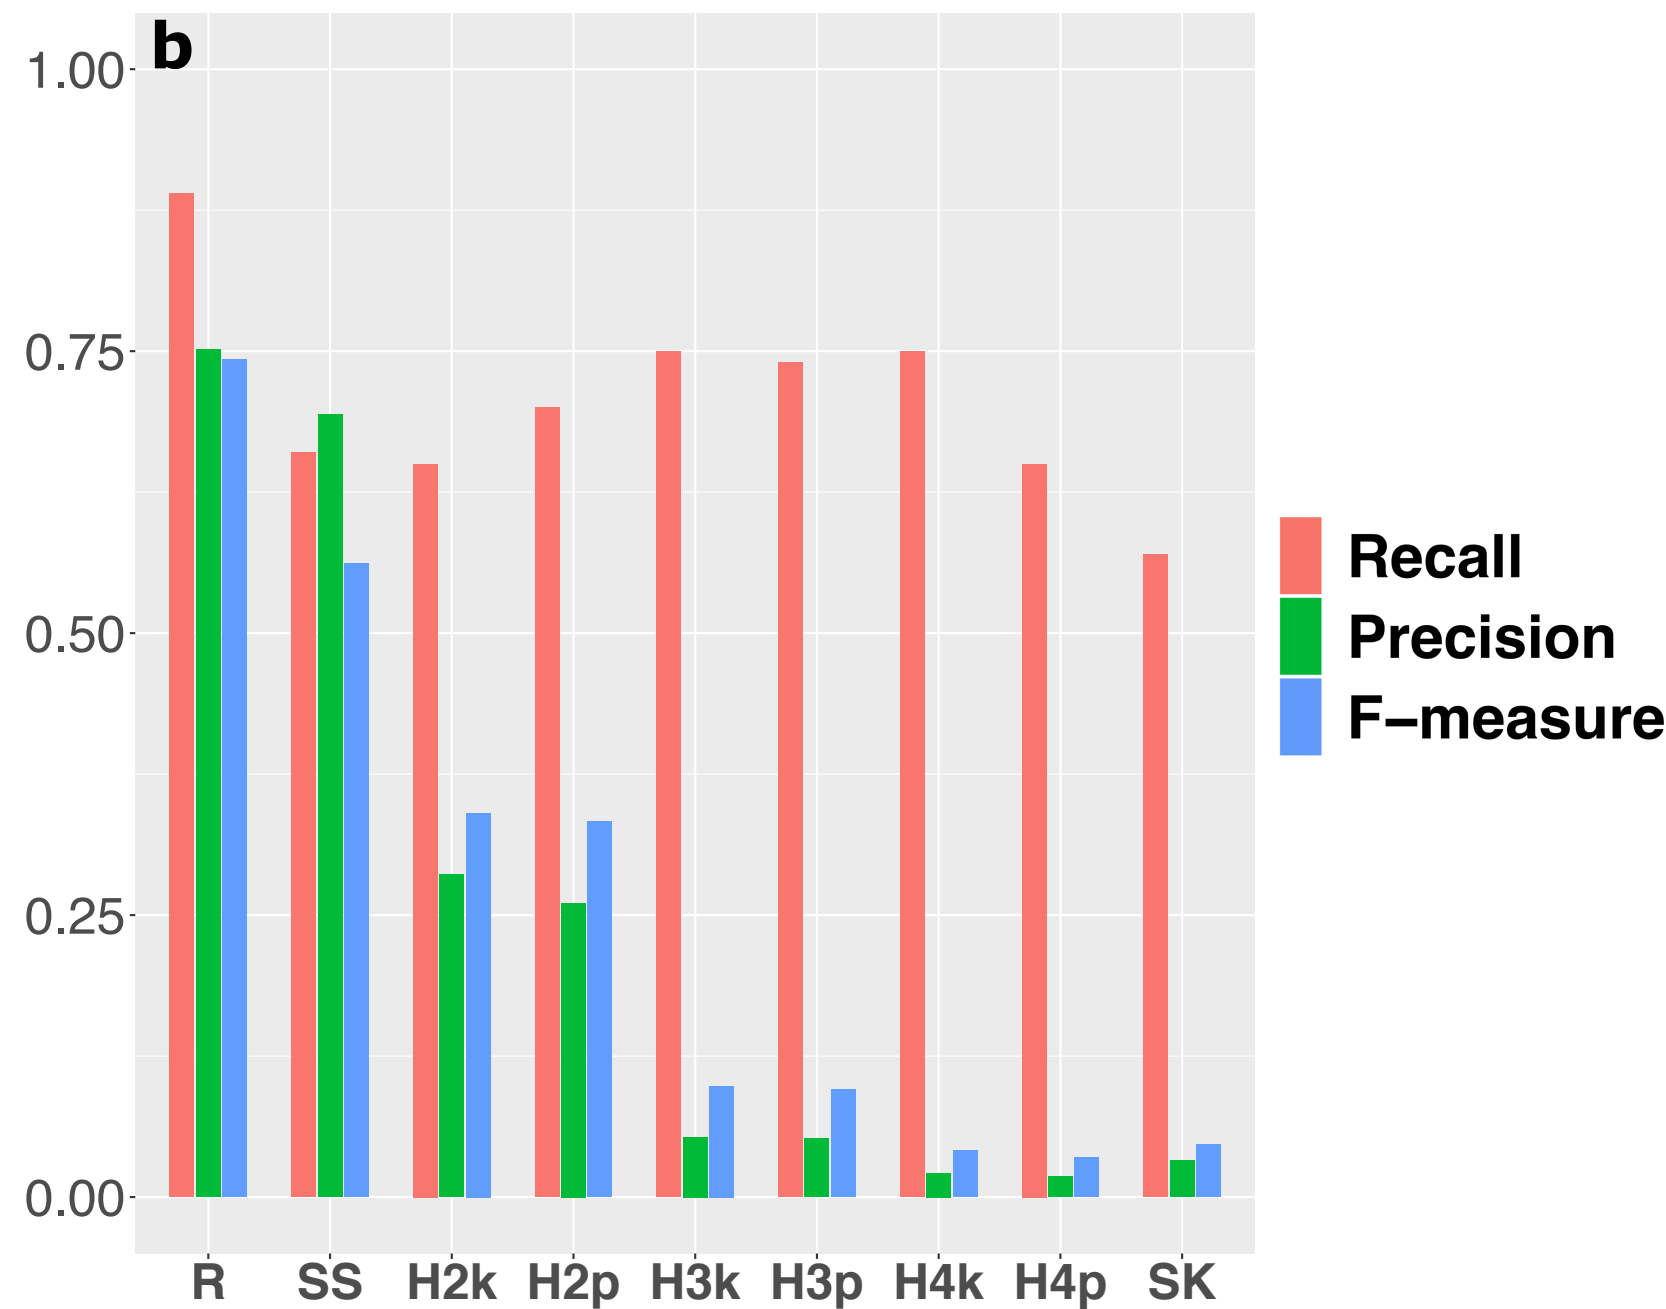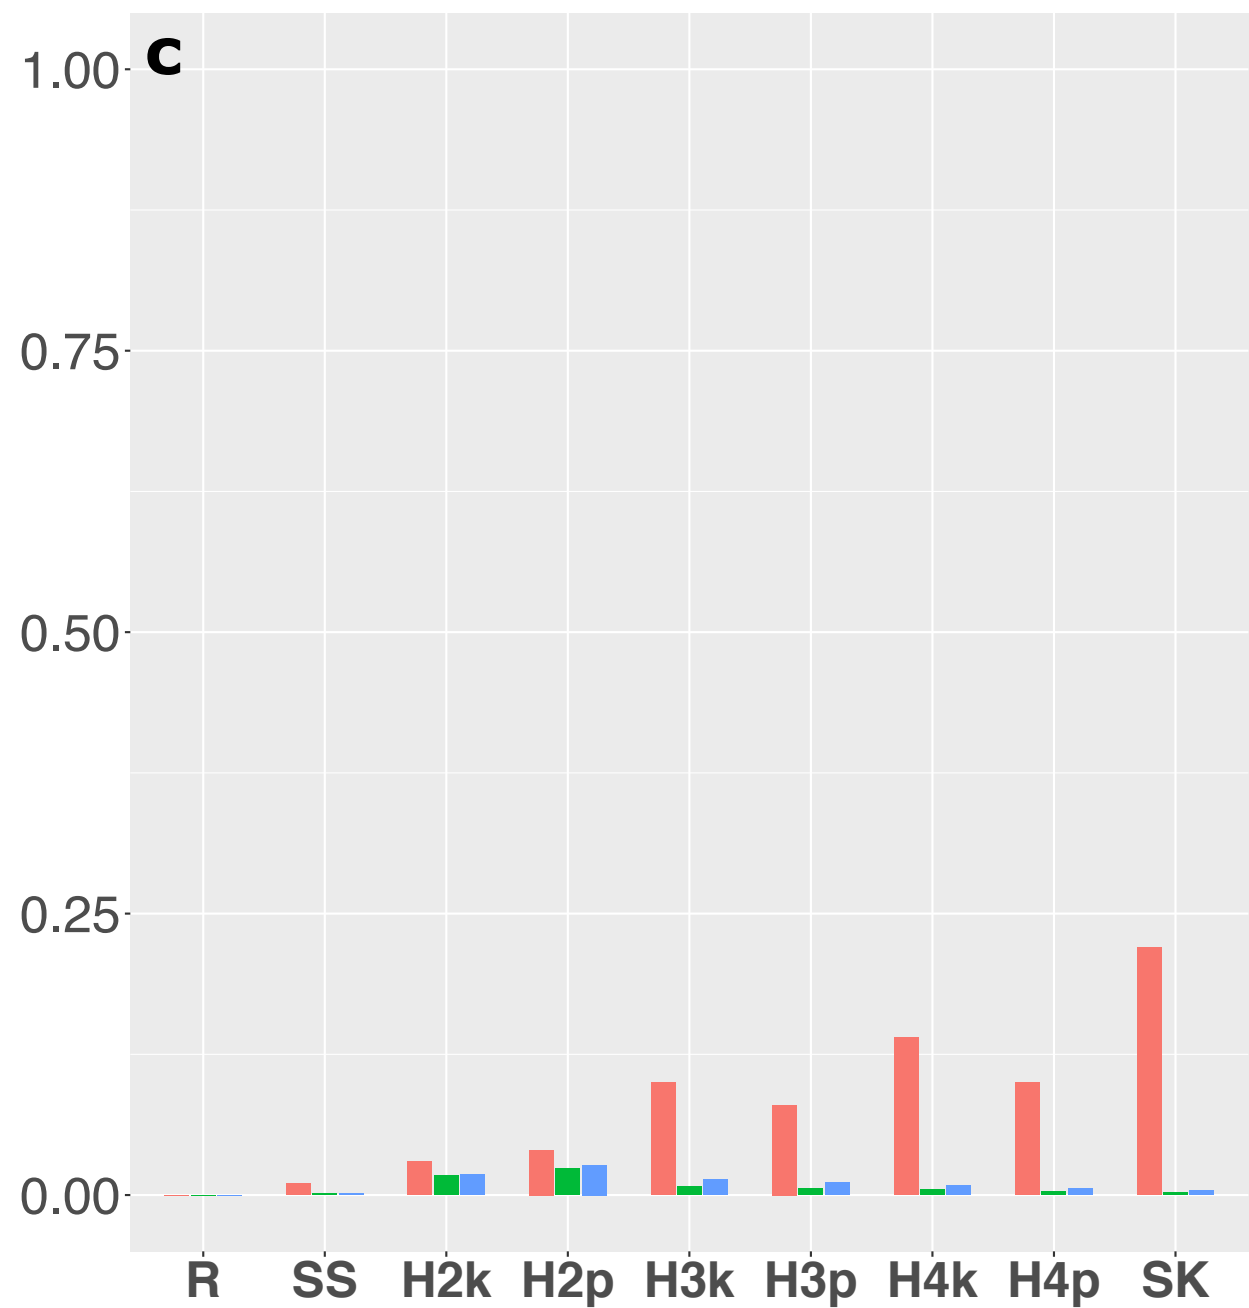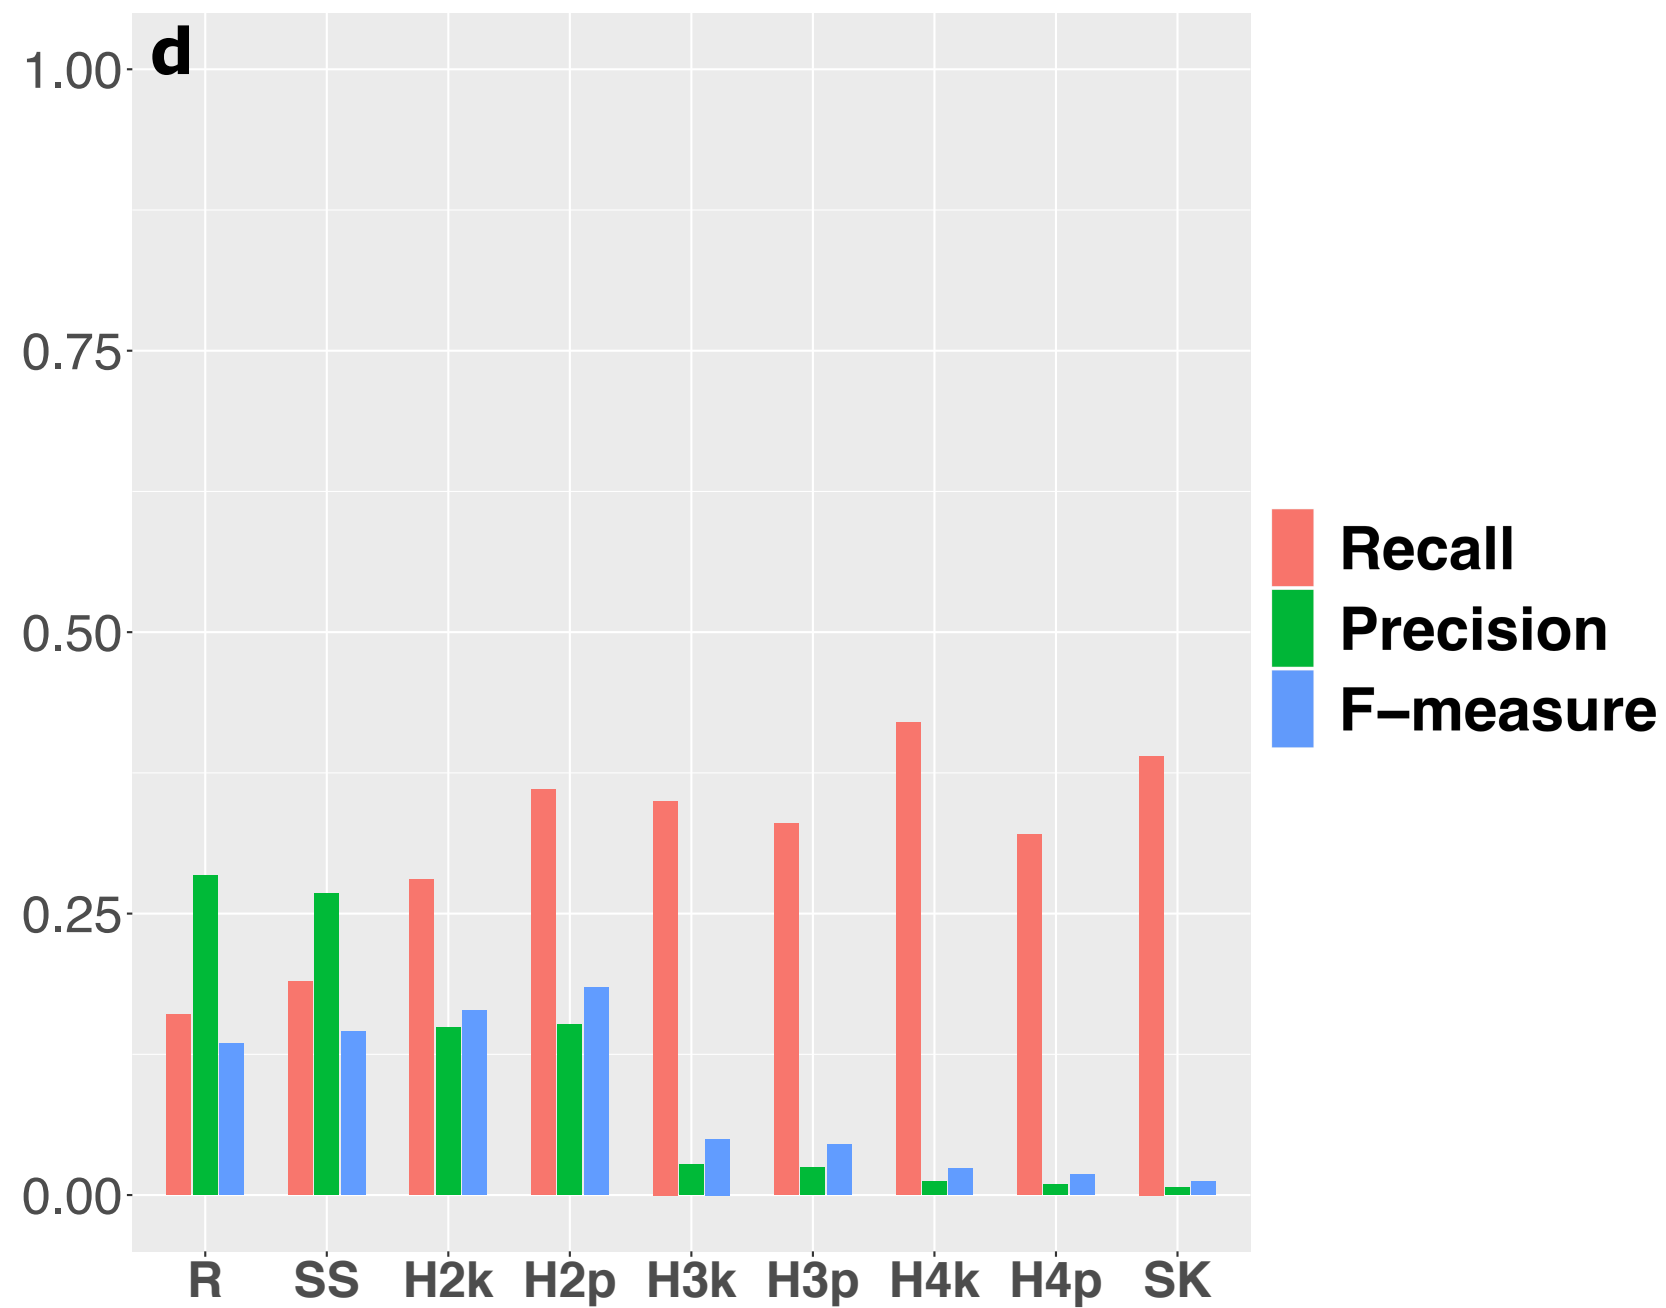

Supplement: pcbi.1007663.s008.pdf [file pcbi.1007663.s008.pdf]
